# Supplementary material for: Phospholipid-templated silica nanocapsules as efficient polyenzymatic biocatalysts
Source: Royal Society of Chemistry journal article supplement (doi:10.1039/c001146k), 2010-01-01
Supplement: c001146k.pdf [file c001146k.pdf]

## Phospholipid-Templated Silica Nanocapsules as Efficient Polyenzymatic Biocatalysts

Lai Truong Phuoc, Paco Laveille, Françoise Chamouleau, Gilbert Renard, Jullien Drone, Bernard Coq, Francois Fajula, Anne Galarneau\*

### Supplementary information

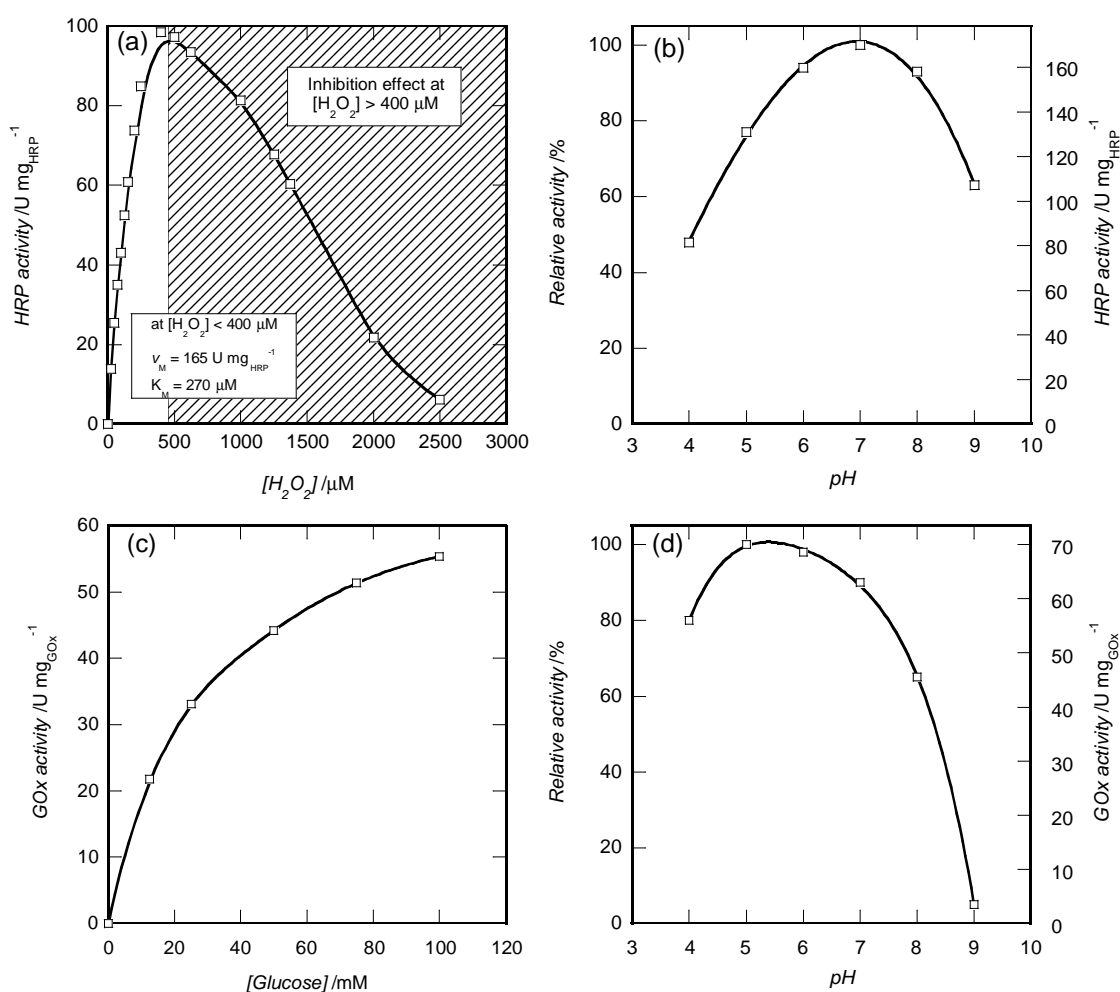

**Figure S1.** Activities for the free HRP and GOx enzymes. HRP activity as a function of: H<sub>2</sub>O<sub>2</sub> concentration (a), and pH ([H<sub>2</sub>O<sub>2</sub>]: 0.25 mM) (b). GOx activity as a function of glucose concentration (c), and pH ([glucose]: 200 mM) (d).

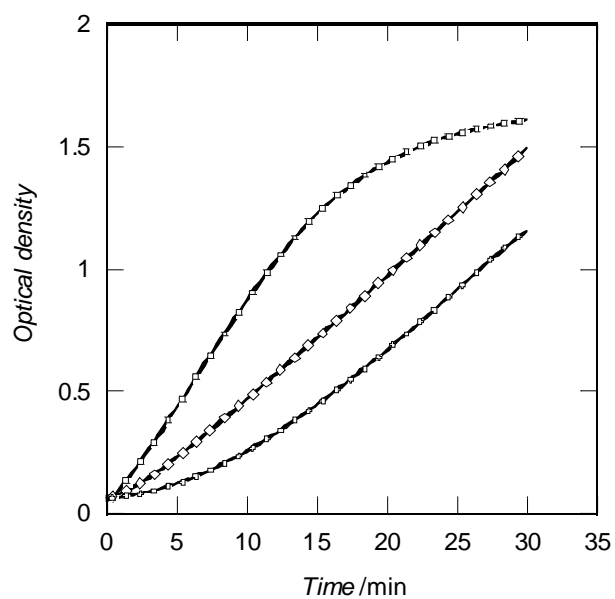

**Figure S2.** Progress of the Trinder reaction (expressed as optical density) as a function of time for GOx/HRP-NPS biocatalyst ( $m = 20$  mg, activity ratio HRP/GOx = 2.9): ( $\square$ ) with addition of 1 mM pure  $\text{H}_2\text{O}_2$ , ( $\diamond$ ) with addition of 200 mM glucose and an excess of free HRP (2.4 U), ( $\circ$ ) with addition of 200 mM glucose.

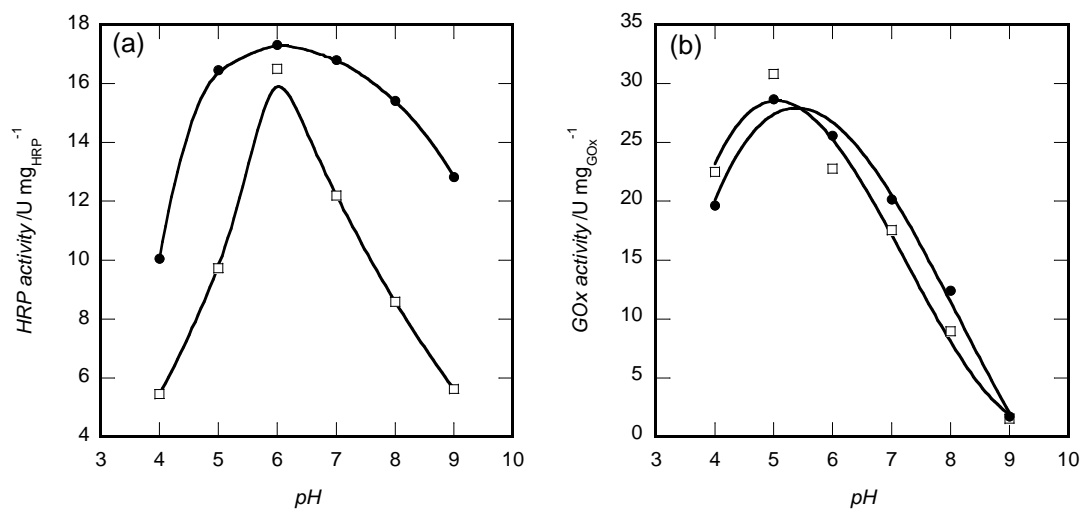

**Figure S3.** Activities ( $v_1$  and  $v_2$ ) in the Trinder reaction of GOx/HRP-NPS: (a) HRP activity ( $v_2$ ) of GOx/HRP-NPS ( $\square$ ) and HRP-NPS ( $\bullet$ ) as a function of pH; (b) GOx activity ( $v_1$ ) of GOx/HRP-NPS ( $\square$ ) and GOx-NPS ( $\bullet$ ) as a function of pH.

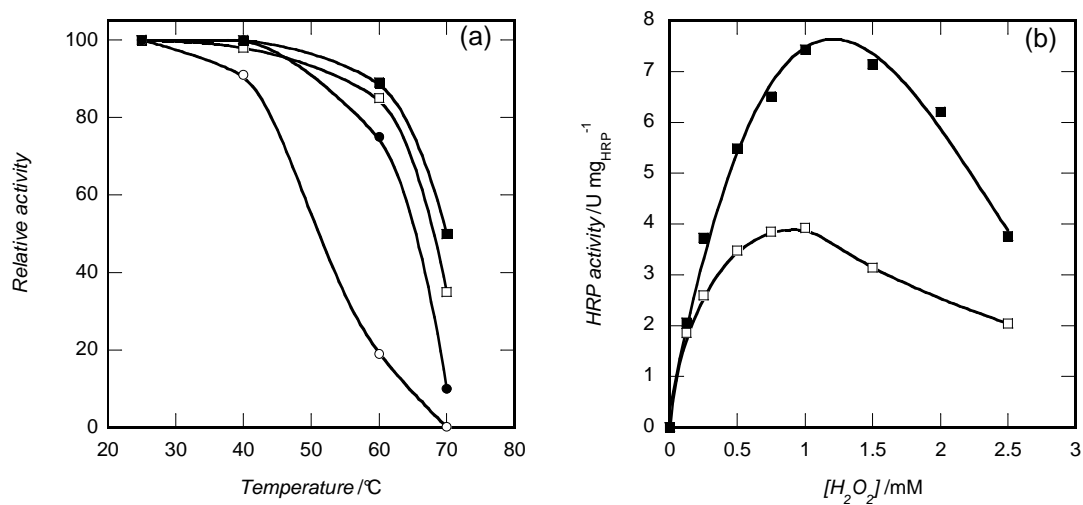

**Figure S4.** (a) Relative activities, with respect to that at 25°C, of the free and NPS-encapsulated enzymes as a function of temperature: (○) free GOx, (●) GOx in GOx/HRP-NPS, (□) free HRP, (■) HRP in GOx/HRP-NPS; (b) HRP activity ( $v_2$ ) as a function of H<sub>2</sub>O<sub>2</sub> concentration for: (■) HRP-NPS, (□) GOx/HRP-NPS.
